# Supplementary material for: Household Food Insecurity, Low Dietary Diversity, and Early Marriage Were Predictors for Undernutrition among Pregnant Women Residing in Gambella, Ethiopia
Source: Hindawi journal article supplement (doi:10.1155/2018/1350195), 2018-01-01
Supplement: f1 [file 1350195.f1.docx]

Table 1: Food groups consumed by pregnant women in Gambella town, 2014 (n=332)

| Food groups | | Frequency | Percentage |
| --- | --- | --- | --- |
| Cereals | yes | 322 | 100 |
| Vitamin A rich vegetables and tubers | Yes | 96 | 29.8 |
| No | 226 | 70.2 |
| White tubers | Yes | 48 | 14.9 |
| No | 274 | 85.1 |
| Dark green leafy vegetables | Yes | 197 | 61.2 |
| No | 125 | 38.8 |
| Other vegetables | Yes | 286 | 88.8 |
| No | 36 | 11.2 |
| Vitamin A rich fruits | Yes | 187 | 58.1 |
| No | 138 | 41.9 |
| Other fruits | Yes | 56 | 17.4 |
| No | 266 | 82.6 |
| Organ meat (iron rich) | Yes | 1 | 0.3 |
| No | 321 | 99.7 |
| Flesh meat | Yes | 93 | 28.9 |
| No | 229 | 71.1 |
| Eggs | Yes | 30 | 9.3 |
| No | 292 | 90.7 |
| Fish | Yes | 65 | 20.2 |
| No | 257 | 79.8 |
| Legumes, nuts and seeds | Yes | 160 | 49.7 |
| No | 162 | 50.3 |
| Milk and milk products | Yes | 81 | 25.2 |
| No | 241 | 74.8 |
| Oils and fats | Yes | 310 | 96.3 |
| No | 12 | 3.7 |
